# Supplementary material
Source: MDPI journal article supplement (https://www.mdpi.com/2073-4441/13/18/2461)
Supplement: s1 [file s1 › water-1312189-supplementary.pdf]

**Table S1.** Questionnaires sent to SHP owners, SHP government administrators and the public

| Type of questions      | Questions                                                                           | Options                              | SHP owners |                | SHP government administrators |                | The public |                |
|------------------------|-------------------------------------------------------------------------------------|--------------------------------------|------------|----------------|-------------------------------|----------------|------------|----------------|
|                        |                                                                                     |                                      | Frequency  | Percentage (%) | Frequency                     | Percentage (%) | Frequency  | Percentage (%) |
| Background Information | What kind of your hydropower projects belongs to?                                   | Diversion type hydropower project    | 274        | 57.3           |                               |                |            |                |
|                        |                                                                                     | Dam type hydropower project          | 126        | 26.4           |                               |                |            |                |
|                        |                                                                                     | Mix type hydropower project          | 78         | 16.3           |                               |                |            |                |
| Environmental Impacts  | Do you think the small-scale hydropower has the negative impact on the environment? | Yes                                  | 247        | 51.7           | 38                            | 69.1           | 494        | 81.9           |
|                        |                                                                                     | No                                   | 231        | 48.3           | 17                            | 30.9           | 109        | 18.1           |
|                        | What kind of complaint from the public is generated by hydropower in your areas?    | Conflict with water supply           |            |                | 12                            | 21.8           |            |                |
|                        |                                                                                     | Conflict with flood prevention       |            |                | 10                            | 18.2           |            |                |
|                        |                                                                                     | Cutting down/ drying the river flows |            |                | 11                            | 20             |            |                |
|                        |                                                                                     | Other conflicts                      |            |                | 27                            | 49.1           |            |                |
|                        |                                                                                     | No complaint from the public         |            |                | 17                            | 30.9           |            |                |
| Opinion                | Do you think the small-scale                                                        | Yes                                  | 461        | 96.4           | 50                            | 90.9           | 493        | 81.8           |

| Type of questions | Questions                                                                          | Options                  | SHP owners |                | SHP government administrators |                | The public |                |
|-------------------|------------------------------------------------------------------------------------|--------------------------|------------|----------------|-------------------------------|----------------|------------|----------------|
|                   |                                                                                    |                          | Frequency  | Percentage (%) | Frequency                     | Percentage (%) | Frequency  | Percentage (%) |
|                   | hydropower belongs to green power?                                                 | No                       | 17         | 3.6            | 5                             | 9.1            | 110        | 18.2           |
|                   | Do you think it is necessary to implement environmental flows?                     | Yes                      | 261        | 54.6           | 35                            | 63.6           | 549        | 91             |
|                   |                                                                                    | No                       | 217        | 45.4           | 20                            | 36.4           | 54         | 9              |
|                   | What are possible difficulties do you think in implementing environmental flows?   | Cognitive conflicts      | 188        | 39.3           | 32                            | 58.2           |            |                |
|                   |                                                                                    | Economic conflicts       | 394        | 82.4           | 48                            | 87.3           |            |                |
|                   |                                                                                    | Technical difficulties   | 153        | 32             | 22                            | 40             |            |                |
|                   |                                                                                    | Insufficient supervision |            |                | 24                            | 43.6           |            |                |
|                   | If the government issues the mechanism of ecological electricity price, which will | Yes, I think so          |            |                | 19                            | 34.6           | 174        | 28.9           |

| Type of questions | Questions                                                                                                                                        | Options                                     | SHP owners |                | SHP government administrators |                | The public |                |
|-------------------|--------------------------------------------------------------------------------------------------------------------------------------------------|---------------------------------------------|------------|----------------|-------------------------------|----------------|------------|----------------|
|                   |                                                                                                                                                  |                                             | Frequency  | Percentage (%) | Frequency                     | Percentage (%) | Frequency  | Percentage (%) |
| Economy           | increase the electricity pricing to compensate the owners to some extent, do you think they (the owners) will carry out the environmental flows? | No, I don't think so                        |            |                | 6                             | 10.9           | 31         | 5.1            |
|                   |                                                                                                                                                  | It depends on the government's supervision. |            |                | 30                            | 54.6           | 398        | 66             |
|                   | How is the impact on your electrical generation by implementing environmental flows under your estimation?                                       | <5%                                         | 66         | 13.8           | 12                            | 21.8           |            |                |
|                   |                                                                                                                                                  | 5%-10%                                      | 142        | 29.7           | 12                            | 21.8           |            |                |
|                   |                                                                                                                                                  | 10%-15%                                     | 85         | 17.8           | 12                            | 21.8           |            |                |
|                   |                                                                                                                                                  | 15%-20%                                     | 71         | 14.9           | 12                            | 21.8           |            |                |
|                   |                                                                                                                                                  | >20%                                        | 114        | 23.9           | 7                             | 12.8           |            |                |
|                   |                                                                                                                                                  | <0%                                         | 28         | 5.9            | 2                             | 3.6            |            |                |

| Type of questions | Questions                                                                                                      | Options                                                                             | SHP owners |                | SHP government administrators |                | The public |                |
|-------------------|----------------------------------------------------------------------------------------------------------------|-------------------------------------------------------------------------------------|------------|----------------|-------------------------------|----------------|------------|----------------|
|                   |                                                                                                                |                                                                                     | Frequency  | Percentage (%) | Frequency                     | Percentage (%) | Frequency  | Percentage (%) |
|                   | How is the average return on your hydropower project at present electricity sale prices to the grid companies? | 0%-5%                                                                               | 159        | 33.3           | 9                             | 16.4           |            |                |
|                   |                                                                                                                | 5%-10%                                                                              | 196        | 41             | 27                            | 49.1           |            |                |
|                   |                                                                                                                | 10%-15%                                                                             | 66         | 13.8           | 13                            | 23.6           |            |                |
|                   |                                                                                                                | >15%                                                                                | 29         | 6.1            | 4                             | 7.3            |            |                |
|                   | What is your perspective on the latest compensation of environmental flows in Fujian Province?                 | The compensation is too high                                                        | 7          | 1.5            | 12                            | 21.8           |            |                |
|                   |                                                                                                                | The compensation is too low                                                         | 189        | 39.5           | 3                             | 5.5            |            |                |
|                   |                                                                                                                | The compensation is reasonable                                                      | 51         | 10.7           | 6                             | 10.9           |            |                |
|                   |                                                                                                                | The compensation should be differentiated by different types of hydropower projects | 211        | 44.1           | 32                            | 58.2           |            |                |
|                   | Who needs to bear the economic loss generated by                                                               | I'm against the compensation                                                        | 20         | 4.2            | 2                             | 3.6            |            |                |
|                   |                                                                                                                | The government solely                                                               | 106        | 22.2           | 4                             | 7.2            | 41         | 6.8            |
|                   |                                                                                                                | The owners of small-scale hydropower project                                        | 24         | 5              | 1                             | 1.8            | 81         | 13.4           |

| Type of questions | Questions                                                                                               | Options                                                      | SHP owners |                | SHP government administrators |                | The public |                |
|-------------------|---------------------------------------------------------------------------------------------------------|--------------------------------------------------------------|------------|----------------|-------------------------------|----------------|------------|----------------|
|                   |                                                                                                         |                                                              | Frequency  | Percentage (%) | Frequency                     | Percentage (%) | Frequency  | Percentage (%) |
|                   | implementing environmental flows?                                                                       | Electricity consumers (by paying more for the electric bill) | 97         | 20.3           | 8                             | 14.5           | 41         | 6.8            |
|                   |                                                                                                         | The government and the owners                                | 62         | 13             | 7                             | 12.7           | 158        | 26.2           |
|                   |                                                                                                         | The government and electricity consumers                     | 56         | 11.7           | 2                             | 3.6            | 24         | 4              |
|                   |                                                                                                         | The government, the owners and electricity consumers         | 253        | 52.9           | 33                            | 60             | 259        | 43             |
|                   | Are you willing to pay 1% more than your usual electricity bill to support environmental improvement by | Yes                                                          |            |                | 28                            | 50.9           | 447        | 74.1           |

| Type of questions | Questions                                                                                                                                                                                         | Options | SHP owners |                | SHP government administrators |                | The public |                |
|-------------------|---------------------------------------------------------------------------------------------------------------------------------------------------------------------------------------------------|---------|------------|----------------|-------------------------------|----------------|------------|----------------|
|                   |                                                                                                                                                                                                   |         | Frequency  | Percentage (%) | Frequency                     | Percentage (%) | Frequency  | Percentage (%) |
|                   |                                                                                                                                                                                                   |         |            |                |                               |                |            |                |
|                   | implementing environmental flows?<br>e.g. If your former electricity bill is 200 CNY per month, you'll need to pay extra 2 CNY per month now (in other words, you need to pay 202 CNY per month). | No      |            |                | 27                            | 49.1%          | 156        | 25.9%          |
|                   | Total                                                                                                                                                                                             |         | 478        |                | 55                            |                | 603        |                |

**Table S2** Interview protocol questions for SHP owners

---

Interview protocol questions

---

Which type does your hydropower project belong to?

Is there any dewatered phenomenon between the power plant and the dam?

Is it difficult for small-scale hydropower project to implement environmental flows? If yes, what difficulties are there?

How much would it affect your electricity generation under your estimation if implementing environmental flows?

Is there any compensation from the government for you to quit the project?

Are you satisfied with the compensation?

Why were you willing to quit your project even though you suffered the losses?

Do you think it necessary for each hydropower project to implement environmental flows?

---

**Table S3** Interview protocol questions for SHP government administrator

---

|                                                                                                                           |
|---------------------------------------------------------------------------------------------------------------------------|
| Interview protocol questions                                                                                              |
| Do you think it necessary to implement environmental flows?                                                               |
| Is it difficult for small-scale hydropower project to implement environmental flows? If yes, what difficulties are there? |
| Who do you think will undertake the economic losses incurred by environmental flows implementation?                       |
| What do you think of the current incentives?                                                                              |

---

**Table S4** Interview protocol questions for hydro-ecology engineer

---

|                                                                                                                           |
|---------------------------------------------------------------------------------------------------------------------------|
| Interview protocol questions                                                                                              |
| What do you think of the negative impacts of small-scale hydropower projects on river ecology?                            |
| Do you have any proposals for mitigating the environmental impacts made by small-scale hydropower projects?               |
| Do you think it necessary to implement environmental flows?                                                               |
| Is it difficult for small-scale hydropower project to implement environmental flows? If yes, what difficulties are there? |
| What do you think of current incentives?                                                                                  |

---
